# Supplementary material for: Significant impairment of health-related quality of life in mainland Chinese patients with chronic hepatitis B: a cross-sectional survey with pair-matched healthy controls
Source: Springer Nature journal article supplement (doi:10.1186/1477-7525-12-101), 2014-01-01

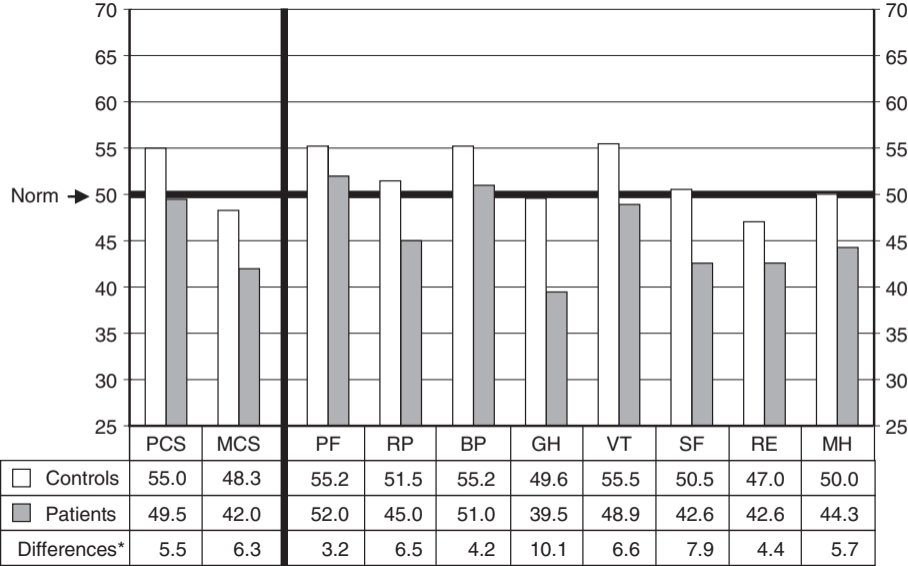

Supplement: 12955_2014_1338_MOESM1_ESM.pdf [file 12955_2014_1338_MOESM1_ESM.pdf]
